# Supplementary material for: Social world perception in the family: a comparison of “soc” in adolescent’s biological and foster families
Source: Royal Society of Chemistry journal article supplement (doi:10.1039/d0cp06085b), 2002-01-01
Supplement: d0cp06085b1.pdf [file d0cp06085b1.pdf]

## Exploring organic semiconductors in solution: The effects of solvation, alkylation, and doping Supplementary Material

Jannis Krumland, Ana M. Valencia, and Caterina Cocchi

February 11, 2021

### Contents

|                                                                                           |            |
|-------------------------------------------------------------------------------------------|------------|
| <b>S1 Energy levels in 6T, different alkyl groups (<i>in vacuo</i>)</b>                   | <b>S2</b>  |
| <b>S2 Charge transfer in 6T/F4-TCNQ: Values</b>                                           | <b>S3</b>  |
| <b>S3 Excitations from LR-TDDFT: 6T alone</b>                                             | <b>S4</b>  |
| S3.1 <i>in vacuo</i> , different alkyl groups, cc-pVDZ . . . . .                          | S4         |
| S3.1.1 <i>arc</i> . . . . .                                                               | S4         |
| S3.1.2 <i>helix</i> . . . . .                                                             | S5         |
| S3.1.3 <i>locally planar</i> . . . . .                                                    | S6         |
| S3.2 different solvents, CH <sub>3</sub> -functionalized, cc-pVDZ . . . . .               | S8         |
| S3.2.1 <i>arc</i> . . . . .                                                               | S8         |
| S3.2.2 <i>helix</i> . . . . .                                                             | S9         |
| S3.2.3 <i>locally planar</i> . . . . .                                                    | S10        |
| <b>S4 Excitations from LR-TDDFT: 6T/F4-TCNQ</b>                                           | <b>S12</b> |
| S4.1 <i>in vacuo</i> , different alkyl groups, cc-pVDZ . . . . .                          | S12        |
| S4.2 different solvents, H-terminated 6T, cc-pVDZ . . . . .                               | S14        |
| S4.3 different solvents, CH <sub>3</sub> -functionalized 6T, cc-pVDZ . . . . .            | S16        |
| S4.4 different solvents, H-terminated 6T, cc-pVTZ . . . . .                               | S18        |
| S4.5 <i>in vacuo</i> , CH <sub>3</sub> -functionalized 6T, different basis sets . . . . . | S20        |

# S1 Energy levels in 6T, different alkyl groups (*in vacuo*)

12 highest occupied and 12 lowest virtual orbitals

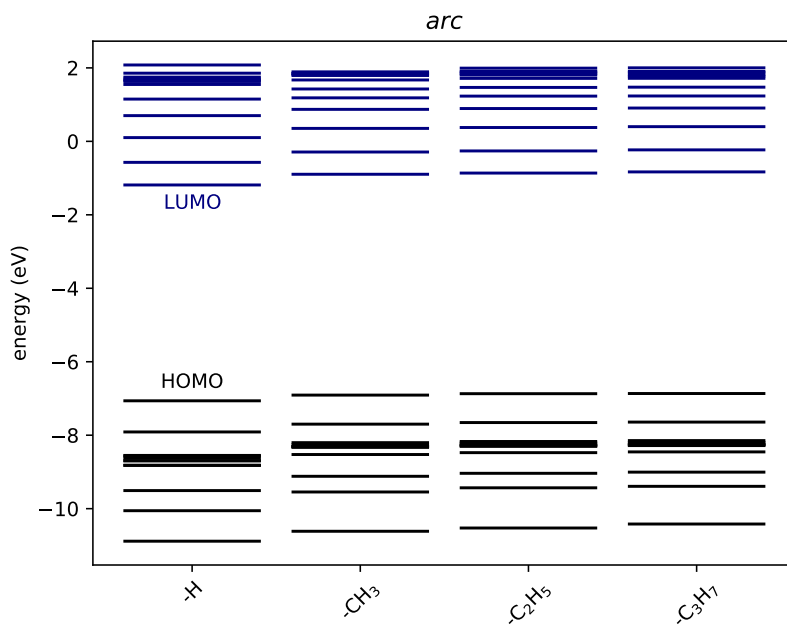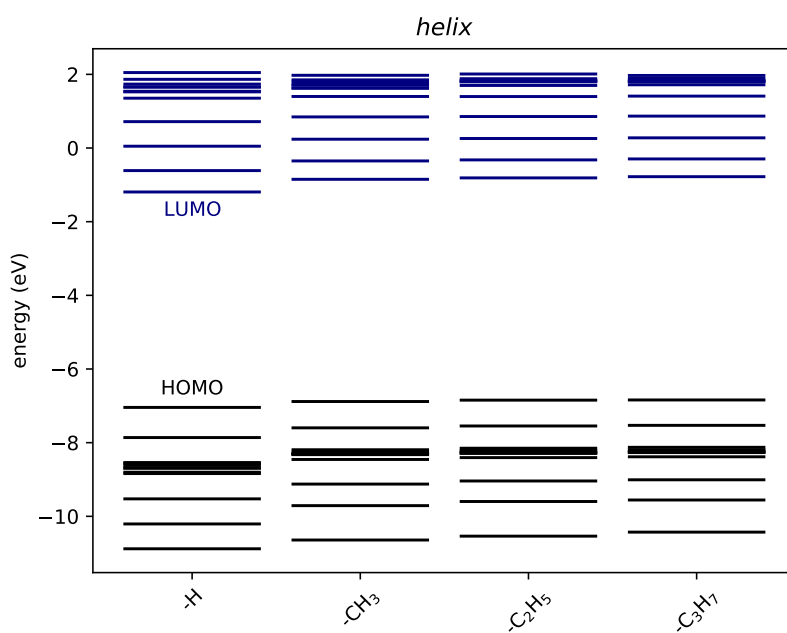

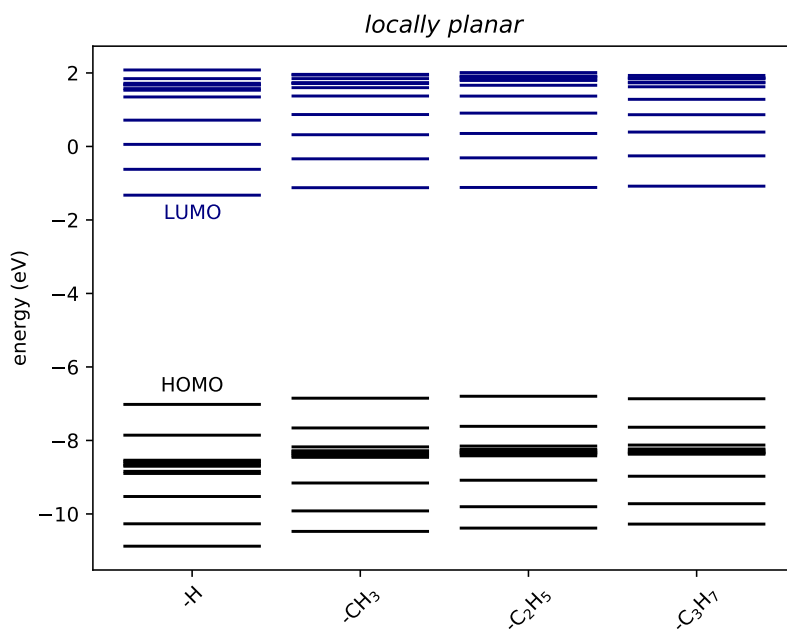

## S2 Charge transfer in 6T/F4-TCNQ: Values

(the *in vacuo* rows correspond to a calculation using the geometry of the respective solvated system, but not taking into account solvation effects directly)

| solvent →                                | none  | C <sub>6</sub> H <sub>6</sub> | CHCl <sub>3</sub> | CH <sub>3</sub> NO <sub>2</sub> |
|------------------------------------------|-------|-------------------------------|-------------------|---------------------------------|
| $\epsilon$                               | 1.00  | 2.27                          | 4.71              | 36.5                            |
| $2(\epsilon-1)/(2\epsilon+1)$            | 0.00  | 0.46                          | 0.71              | 0.96                            |
| CT (-H)                                  | 0.277 | 0.317                         | 0.338             | 0.357                           |
| CT (-H, <i>in vacuo</i> )                | 0.277 | 0.282                         | 0.284             | 0.285                           |
| CT (-CH <sub>3</sub> )                   | 0.387 | 0.448                         | 0.482             | 0.520                           |
| CT (-CH <sub>3</sub> , <i>in vacuo</i> ) | 0.387 | 0.405                         | 0.412             | 0.416                           |
| CT (-C <sub>2</sub> H <sub>5</sub> )     | 0.441 |                               |                   |                                 |
| CT (-C <sub>3</sub> H <sub>7</sub> )     | 0.450 |                               |                   |                                 |

### S3 Excitations from LR-TDDFT: 6T alone

(all single-particle transitions with weight  $\geq 10\%$  listed)

#### S3.1 *in vacuo*, different alkyl groups, cc-pVDZ

##### S3.1.1 *arc*

###### -H

| # | $E$ (eV) | OS   | transition (weight)                                                                                                  |
|---|----------|------|----------------------------------------------------------------------------------------------------------------------|
| 1 | 3.11     | 2.03 | H $\rightarrow$ L (87%)                                                                                              |
| 2 | 3.79     | 0.02 | H $\rightarrow$ L+1 (51%)<br>H-1 $\rightarrow$ L (40%)                                                               |
| 3 | 4.39     | 0.14 | H $\rightarrow$ L+2 (41%)<br>H-1 $\rightarrow$ L+1 (31%)<br>H-2 $\rightarrow$ L (17%)                                |
| 4 | 4.44     | 0.00 | H-1 $\rightarrow$ L (48%)<br>H $\rightarrow$ L+1 (35%)                                                               |
| 5 | 4.85     | 0.00 | H $\rightarrow$ L+3 (38%)<br>H-1 $\rightarrow$ L+2 (21%)<br>H-7 $\rightarrow$ L (12%)<br>H-2 $\rightarrow$ L+1 (11%) |

###### -CH<sub>3</sub>

| # | $E$ (eV) | OS   | transition (weight)                                                                   |
|---|----------|------|---------------------------------------------------------------------------------------|
| 1 | 3.22     | 1.91 | H $\rightarrow$ L (86%)                                                               |
| 2 | 3.88     | 0.05 | H $\rightarrow$ L+1 (51%)<br>H-1 $\rightarrow$ L (39%)                                |
| 3 | 4.44     | 0.13 | H $\rightarrow$ L+2 (41%)<br>H-1 $\rightarrow$ L+1 (30%)<br>H-2 $\rightarrow$ L (17%) |
| 4 | 4.54     | 0.00 | H-1 $\rightarrow$ L (46%)<br>H $\rightarrow$ L+1 (34%)                                |
| 5 | 4.86     | 0.01 | H $\rightarrow$ L+3 (43%)<br>H-1 $\rightarrow$ L+2 (19%)                              |

###### -C<sub>2</sub>H<sub>5</sub>

| # | $E$ (eV) | OS   | transition (weight)                                                                   |
|---|----------|------|---------------------------------------------------------------------------------------|
| 1 | 3.21     | 1.90 | H $\rightarrow$ L (86%)                                                               |
| 2 | 3.86     | 0.06 | H $\rightarrow$ L+1 (51%)<br>H-1 $\rightarrow$ L (39%)                                |
| 3 | 4.42     | 0.12 | H $\rightarrow$ L+2 (42%)<br>H-1 $\rightarrow$ L+1 (30%)<br>H-2 $\rightarrow$ L (17%) |
| 4 | 4.53     | 0.00 | H-1 $\rightarrow$ L (46%)<br>H $\rightarrow$ L+1 (33%)                                |
| 5 | 4.85     | 0.01 | H $\rightarrow$ L+3 (42%)<br>H-1 $\rightarrow$ L+2 (20%)                              |

**-C<sub>3</sub>H<sub>7</sub>**

| # | <i>E</i> (eV) | OS   | transition (weight)                         |
|---|---------------|------|---------------------------------------------|
| 1 | 3.23          | 1.88 | H→L (86%)                                   |
| 2 | 3.87          | 0.07 | H→L+1 (51%)<br>H-1→L (39%)                  |
| 3 | 4.44          | 0.13 | H→L+2 (41%)<br>H-1→L+1 (30%)<br>H-2→L (17%) |
| 4 | 4.55          | 0.00 | H-1→L (46%)<br>H→L+1 (33%)                  |
| 5 | 4.86          | 0.01 | H→L+3 (42%)<br>H-1→L+2 (20%)                |

**S3.1.2 helix**

**-H**

| # | <i>E</i> (eV) | OS   | transition (weight)                                          |
|---|---------------|------|--------------------------------------------------------------|
| 1 | 3.10          | 1.99 | H→L (86%)                                                    |
| 2 | 3.76          | 0.00 | H→L+1 (51%)<br>H-1→L (40%)                                   |
| 3 | 4.34          | 0.16 | H→L+2 (38%)<br>H-1→L+1 (34%)<br>H-2→L (18%)                  |
| 4 | 4.39          | 0.00 | H-1→L (47%)<br>H→L+1 (35%)                                   |
| 5 | 4.85          | 0.00 | H→L+3 (27%)<br>H-1→L+2 (25%)<br>H-2→L+1 (17%)<br>H-6→L (12%) |

**-CH<sub>3</sub>**

| # | <i>E</i> (eV) | OS   | transition (weight)                           |
|---|---------------|------|-----------------------------------------------|
| 1 | 3.29          | 1.87 | H→L (85%)                                     |
| 2 | 3.87          | 0.00 | H→L+1 (51%)<br>H-1→L (39%)                    |
| 3 | 4.38          | 0.16 | H→L+2 (37%)<br>H-1→L+1 (35%)<br>H-2→L (18%)   |
| 4 | 4.49          | 0.00 | H-1→L (45%)<br>H→L+1 (32%)                    |
| 5 | 4.85          | 0.01 | H→L+3 (28%)<br>H-1→L+2 (27%)<br>H-2→L+1 (18%) |

**-C<sub>2</sub>H<sub>5</sub>**

| # | <i>E</i> (eV) | OS   | transition (weight)                           |
|---|---------------|------|-----------------------------------------------|
| 1 | 3.29          | 1.84 | H→L (85%)                                     |
| 2 | 3.86          | 0.00 | H→L+1 (51%)<br>H-1→L (39%)                    |
| 3 | 4.36          | 0.16 | H→L+2 (37%)<br>H-1→L+1 (35%)<br>H-2→L (18%)   |
| 4 | 4.48          | 0.00 | H-1→L (45%)<br>H→L+1 (32%)                    |
| 5 | 4.83          | 0.02 | H-1→L+2 (28%)<br>H→L+3 (28%)<br>H-2→L+1 (19%) |

**-C<sub>3</sub>H<sub>7</sub>**

| # | <i>E</i> (eV) | OS   | transition (weight)                           |
|---|---------------|------|-----------------------------------------------|
| 1 | 3.31          | 1.82 | H→L (85%)                                     |
| 2 | 3.87          | 0.01 | H→L+1 (51%)<br>H-1→L (39%)                    |
| 3 | 4.37          | 0.17 | H→L+2 (36%)<br>H-1→L+1 (35%)<br>H-2→L (18%)   |
| 4 | 4.50          | 0.00 | H-1→L (45%)<br>H→L+1 (32%)                    |
| 5 | 4.83          | 0.02 | H-1→L+2 (28%)<br>H→L+3 (28%)<br>H-2→L+1 (19%) |

**S3.1.3 locally planar**

**-H**

| # | <i>E</i> (eV) | OS   | transition (weight)                         |
|---|---------------|------|---------------------------------------------|
| 1 | 2.87          | 1.97 | H→L (89%)                                   |
| 2 | 3.66          | 0.01 | H→L+1 (54%)<br>H-1→L (37%)                  |
| 3 | 4.20          | 0.00 | H-1→L (51%)<br>H→L+1 (34%)                  |
| 4 | 4.27          | 0.18 | H→L+2 (42%)<br>H-1→L+1 (31%)<br>H-2→L (16%) |
| 5 | 4.78          | 0.01 | H-2→L (47%)<br>H→L+2 (33%)                  |

**-CH<sub>3</sub>**

| # | <i>E</i> (eV) | OS   | transition (weight)                         |
|---|---------------|------|---------------------------------------------|
| 1 | 2.81          | 1.92 | H→L (91%)                                   |
| 2 | 3.67          | 0.01 | H→L+1 (58%)<br>H-1→L (33%)                  |
| 3 | 4.16          | 0.02 | H-1→L (55%)<br>H→L+1 (29%)                  |
| 4 | 4.30          | 0.19 | H→L+2 (49%)<br>H-1→L+1 (27%)<br>H-2→L (11%) |
| 5 | 4.72          | 0.01 | H-2→L (26%)<br>H→L+3 (20%)<br>H→L+2 (13%)   |

**-C<sub>2</sub>H<sub>5</sub>**

| # | <i>E</i> (eV) | OS   | transition (weight)                         |
|---|---------------|------|---------------------------------------------|
| 1 | 2.74          | 1.93 | H→L (91%)                                   |
| 2 | 3.62          | 0.00 | H→L+1 (59%)<br>H-1→L (32%)                  |
| 3 | 4.10          | 0.02 | H-1→L (56%)<br>H→L+1 (28%)                  |
| 4 | 4.26          | 0.19 | H→L+2 (49%)<br>H-1→L+1 (26%)<br>H-2→L (11%) |
| 5 | 4.68          | 0.02 | H-2→L (35%)<br>H→L+3 (15%)<br>H→L+2 (14%)   |

**-C<sub>3</sub>H<sub>7</sub>**

| # | <i>E</i> (eV) | OS   | transition (weight)                         |
|---|---------------|------|---------------------------------------------|
| 1 | 2.79          | 1.85 | H→L (91%)                                   |
| 2 | 3.68          | 0.00 | H→L+1 (60%)<br>H-1→L (31%)                  |
| 3 | 4.17          | 0.03 | H-1→L (56%)<br>H→L+1 (27%)                  |
| 4 | 4.32          | 0.17 | H→L+2 (45%)<br>H-1→L+1 (26%)<br>H-2→L (12%) |
| 5 | 4.71          | 0.01 | H-2→L (29%)<br>H→L+3 (21%)                  |

### S3.2 different solvents, CH<sub>3</sub>-functionalized, cc-pVDZ

#### S3.2.1 *arc*

##### *in vacuo*

| # | <i>E</i> (eV) | OS   | transition (weight)                         |
|---|---------------|------|---------------------------------------------|
| 1 | 3.22          | 1.91 | H→L (86%)                                   |
| 2 | 3.88          | 0.05 | H→L+1 (51%)<br>H-1→L (39%)                  |
| 3 | 4.44          | 0.13 | H→L+2 (41%)<br>H-1→L+1 (30%)<br>H-2→L (17%) |
| 4 | 4.54          | 0.00 | H-1→L (46%)<br>H→L+1 (34%)                  |
| 5 | 4.86          | 0.01 | H→L+3 (43%)<br>H-1→L+2 (19%)                |

##### benzene (apolar)

| # | <i>E</i> (eV) | OS   | transition (weight)                         |
|---|---------------|------|---------------------------------------------|
| 1 | 3.10          | 2.10 | H→L (86%)                                   |
| 2 | 3.74          | 0.06 | H→L+1 (50%)<br>H-1→L (40%)                  |
| 3 | 4.34          | 0.17 | H→L+2 (40%)<br>H-1→L+1 (31%)<br>H-2→L (18%) |
| 4 | 4.50          | 0.00 | H-1→L (46%)<br>H→L+1 (35%)                  |
| 5 | 4.81          | 0.01 | H→L+3 (41%)<br>H-1→L+2 (21%)                |

##### chloroform (semi-polar)

| # | <i>E</i> (eV) | OS   | transition (weight)                         |
|---|---------------|------|---------------------------------------------|
| 1 | 3.06          | 2.10 | H→L (87%)                                   |
| 2 | 3.72          | 0.05 | H→L+1 (50%)<br>H-1→L (40%)                  |
| 3 | 4.33          | 0.17 | H→L+2 (40%)<br>H-1→L+1 (31%)<br>H-2→L (18%) |
| 4 | 4.47          | 0.00 | H-1→L (46%)<br>H→L+1 (35%)                  |
| 5 | 4.80          | 0.01 | H→L+3 (41%)<br>H-1→L+2 (21%)                |



**nitromethane (polar)**

| # | $E$ (eV) | OS   | transition (weight)                         |
|---|----------|------|---------------------------------------------|
| 1 | 3.03     | 2.10 | H→L (87%)                                   |
| 2 | 3.70     | 0.04 | H→L+1 (50%)<br>H-1→L (40%)                  |
| 3 | 4.32     | 0.17 | H→L+2 (40%)<br>H-1→L+1 (31%)<br>H-2→L (18%) |
| 4 | 4.42     | 0.00 | H-1→L (47%)<br>H→L+1 (35%)                  |
| 5 | 4.80     | 0.01 | H→L+3 (40%)<br>H-1→L+2 (21%)                |

**S3.2.2 helix**

*in vacuo*

| # | $E$ (eV) | OS   | transition (weight)                           |
|---|----------|------|-----------------------------------------------|
| 1 | 3.29     | 1.87 | H→L (85%)                                     |
| 2 | 3.87     | 0.00 | H→L+1 (51%)<br>H-1→L (39%)                    |
| 3 | 4.38     | 0.16 | H→L+2 (37%)<br>H-1→L+1 (35%)<br>H-2→L (18%)   |
| 4 | 4.49     | 0.00 | H-1→L (45%)<br>H→L+1 (32%)                    |
| 5 | 4.85     | 0.01 | H→L+3 (28%)<br>H-1→L+2 (27%)<br>H-2→L+1 (18%) |

**benzene (apolar)**

| # | $E$ (eV) | OS   | transition (weight)                           |
|---|----------|------|-----------------------------------------------|
| 1 | 3.11     | 2.06 | H→L (86%)                                     |
| 2 | 3.71     | 0.00 | H→L+1 (50%)<br>H-1→L (39%)                    |
| 3 | 4.28     | 0.21 | H→L+2 (37%)<br>H-1→L+1 (34%)<br>H-2→L (19%)   |
| 4 | 4.44     | 0.00 | H-1→L (45%)<br>H→L+1 (34%)                    |
| 5 | 4.79     | 0.01 | H→L+3 (29%)<br>H-1→L+2 (26%)<br>H-2→L+1 (17%) |

**chloroform (semi-polar)**

| # | $E$ (eV) | OS   | transition (weight)                                                                     |
|---|----------|------|-----------------------------------------------------------------------------------------|
| 1 | 3.07     | 2.07 | H $\rightarrow$ L (86%)                                                                 |
| 2 | 3.69     | 0.00 | H $\rightarrow$ L+1 (51%)<br>H-1 $\rightarrow$ L (39%)                                  |
| 3 | 4.27     | 0.20 | H $\rightarrow$ L+2 (37%)<br>H-1 $\rightarrow$ L+1 (34%)<br>H-2 $\rightarrow$ L (19%)   |
| 4 | 4.41     | 0.00 | H-1 $\rightarrow$ L (46%)<br>H $\rightarrow$ L+1 (34%)                                  |
| 5 | 4.79     | 0.01 | H $\rightarrow$ L+3 (29%)<br>H-1 $\rightarrow$ L+2 (26%)<br>H-2 $\rightarrow$ L+1 (16%) |

**nitromethane (polar)**

| # | $E$ (eV) | OS   | transition (weight)                                                                     |
|---|----------|------|-----------------------------------------------------------------------------------------|
| 1 | 2.96     | 2.10 | H $\rightarrow$ L (87%)                                                                 |
| 2 | 3.64     | 0.00 | H $\rightarrow$ L+1 (51%)<br>H-1 $\rightarrow$ L (39%)                                  |
| 3 | 4.25     | 0.20 | H $\rightarrow$ L+2 (39%)<br>H-1 $\rightarrow$ L+1 (32%)<br>H-2 $\rightarrow$ L (18%)   |
| 4 | 4.33     | 0.00 | H-1 $\rightarrow$ L (47%)<br>H $\rightarrow$ L+1 (34%)                                  |
| 5 | 4.78     | 0.00 | H $\rightarrow$ L+3 (28%)<br>H-1 $\rightarrow$ L+2 (21%)<br>H-2 $\rightarrow$ L+1 (12%) |

**S3.2.3 locally planar***in vacuo*

| # | $E$ (eV) | OS   | transition (weight)                                                                   |
|---|----------|------|---------------------------------------------------------------------------------------|
| 1 | 2.81     | 1.92 | H $\rightarrow$ L (91%)                                                               |
| 2 | 3.67     | 0.01 | H $\rightarrow$ L+1 (58%)<br>H-1 $\rightarrow$ L (33%)                                |
| 3 | 4.16     | 0.02 | H-1 $\rightarrow$ L (55%)<br>H $\rightarrow$ L+1 (29%)                                |
| 4 | 4.30     | 0.19 | H $\rightarrow$ L+2 (49%)<br>H-1 $\rightarrow$ L+1 (27%)<br>H-2 $\rightarrow$ L (11%) |
| 5 | 4.72     | 0.01 | H-2 $\rightarrow$ L (26%)<br>H $\rightarrow$ L+3 (20%)<br>H $\rightarrow$ L+2 (13%)   |

**benzene (apolar)**

| # | $E$ (eV) | OS   | transition (weight)                         |
|---|----------|------|---------------------------------------------|
| 1 | 2.66     | 2.11 | H→L (90%)                                   |
| 2 | 3.50     | 0.01 | H→L+1 (55%)<br>H-1→L (36%)                  |
| 3 | 4.10     | 0.05 | H-1→L (49%)<br>H→L+1 (30%)                  |
| 4 | 4.17     | 0.20 | H→L+2 (42%)<br>H-1→L+1 (28%)<br>H-2→L (13%) |
| 5 | 4.67     | 0.01 | H-2→L (28%)<br>H→L+3 (17%)<br>H→L+2 (16%)   |

**chloroform (semi-polar)**

| # | $E$ (eV) | OS   | transition (weight)                         |
|---|----------|------|---------------------------------------------|
| 1 | 2.66     | 2.11 | H→L (90%)                                   |
| 2 | 3.50     | 0.01 | H→L+1 (55%)<br>H-1→L (36%)                  |
| 3 | 4.09     | 0.04 | H-1→L (50%)<br>H→L+1 (30%)                  |
| 4 | 4.16     | 0.21 | H→L+2 (43%)<br>H-1→L+1 (29%)<br>H-2→L (14%) |
| 5 | 4.66     | 0.01 | H-2→L (36%)<br>H→L+2 (20%)<br>H→L+3 (11%)   |

**nitromethane (polar)**

| # | $E$ (eV) | OS   | transition (weight)                         |
|---|----------|------|---------------------------------------------|
| 1 | 2.66     | 2.10 | H→L (91%)                                   |
| 2 | 3.50     | 0.01 | H→L+1 (55%)<br>H-1→L (36%)                  |
| 3 | 4.07     | 0.03 | H-1→L (51%)<br>H→L+1 (31%)                  |
| 4 | 4.15     | 0.21 | H→L+2 (44%)<br>H-1→L+1 (29%)<br>H-2→L (14%) |
| 5 | 4.65     | 0.01 | H-2→L (43%)<br>H→L+2 (25%)                  |

## S4 Excitations from LR-TDDFT: 6T/F4-TCNQ

(all single-particle transitions with weight  $\geq 10\%$  listed)

### S4.1 *in vacuo*, different alkyl groups, cc-pVDZ

#### -H

| #  | $E$ (eV) | OS   | transition (weight)                                                                  |
|----|----------|------|--------------------------------------------------------------------------------------|
| 1  | 1.46     | 0.10 | H $\rightarrow$ L (97%)                                                              |
| 2  | 2.03     | 0.32 | H-1 $\rightarrow$ L (95%)                                                            |
| 3  | 2.76     | 0.43 | H $\rightarrow$ L+1 (63%)<br>H-3 $\rightarrow$ L (28%)                               |
| 4  | 3.01     | 0.02 | H-2 $\rightarrow$ L (85%)                                                            |
| 5  | 3.10     | 0.01 | H-9 $\rightarrow$ L (74%)<br>H-12 $\rightarrow$ L (14%)                              |
| 6  | 3.12     | 2.12 | H-3 $\rightarrow$ L (67%)<br>H $\rightarrow$ L+1 (26%)                               |
| 7  | 3.43     | 0.00 | H-10 $\rightarrow$ L (61%)<br>H-6 $\rightarrow$ L (28%)                              |
| 8  | 3.54     | 0.01 | H-1 $\rightarrow$ L+1 (71%)<br>H $\rightarrow$ L+2 (19%)                             |
| 9  | 3.59     | 0.01 | H-7 $\rightarrow$ L (73%)<br>H-5 $\rightarrow$ L (14%)                               |
| 10 | 3.61     | 0.01 | H-6 $\rightarrow$ L (51%)<br>H-10 $\rightarrow$ L (31%)<br>H-4 $\rightarrow$ L (12%) |

#### -CH<sub>3</sub>

| #  | $E$ (eV) | OS   | transition (weight)                                     |
|----|----------|------|---------------------------------------------------------|
| 1  | 1.34     | 0.11 | H $\rightarrow$ L (98%)                                 |
| 2  | 1.95     | 0.40 | H-1 $\rightarrow$ L (94%)                               |
| 3  | 2.69     | 0.32 | H $\rightarrow$ L+1 (56%)<br>H-3 $\rightarrow$ L (35%)  |
| 4  | 2.92     | 0.13 | H-2 $\rightarrow$ L (70%)<br>H-9 $\rightarrow$ L (12%)  |
| 5  | 3.04     | 0.17 | H-9 $\rightarrow$ L (67%)<br>H-12 $\rightarrow$ L (14%) |
| 6  | 3.07     | 1.73 | H-3 $\rightarrow$ L (51%)<br>H $\rightarrow$ L+1 (29%)  |
| 7  | 3.28     | 0.00 | H-10 $\rightarrow$ L (89%)                              |
| 8  | 3.32     | 0.03 | H-7 $\rightarrow$ L (50%)<br>H-6 $\rightarrow$ L (34%)  |
| 9  | 3.32     | 0.00 | H-6 $\rightarrow$ L (57%)<br>H-7 $\rightarrow$ L (36%)  |
| 10 | 3.52     | 0.01 | H-12 $\rightarrow$ L (79%)<br>H-9 $\rightarrow$ L (15%) |

**-C<sub>2</sub>H<sub>5</sub>**

| #  | <i>E</i> (eV) | OS   | transition (weight)                        |
|----|---------------|------|--------------------------------------------|
| 1  | 1.32          | 0.11 | H→L (98%)                                  |
| 2  | 1.94          | 0.47 | H-1→L (93%)                                |
| 3  | 2.65          | 0.35 | H→L+1 (57%)<br>H-3→L (28%)                 |
| 4  | 2.91          | 0.31 | H-2→L (72%)                                |
| 5  | 3.03          | 0.02 | H-9→L (73%)<br>H-12→L (13%)<br>H-2→L (10%) |
| 6  | 3.04          | 1.59 | H-3→L (62%)<br>H→L+1 (27%)                 |
| 7  | 3.27          | 0.01 | H-10→L (93%)                               |
| 8  | 3.28          | 0.00 | H-6→L (89%)                                |
| 9  | 3.36          | 0.02 | H-7→L (88%)                                |
| 10 | 3.51          | 0.01 | H-12→L (80%)<br>H-9→L (14%)                |

**-C<sub>3</sub>H<sub>7</sub>**

| #  | <i>E</i> (eV) | OS   | transition (weight)                        |
|----|---------------|------|--------------------------------------------|
| 1  | 1.37          | 0.13 | H→L (98%)                                  |
| 2  | 1.97          | 0.52 | H-1→L (93%)                                |
| 3  | 2.69          | 0.25 | H→L+1 (50%)<br>H-3→L (36%)                 |
| 4  | 2.92          | 0.06 | H-2→L (71%)<br>H-9→L (13%)                 |
| 5  | 3.00          | 0.03 | H-9→L (68%)<br>H-2→L (11%)<br>H-12→L (10%) |
| 6  | 3.04          | 1.70 | H-3→L (46%)<br>H→L+1 (37%)                 |
| 7  | 3.26          | 0.07 | H-10→L (87%)                               |
| 8  | 3.31          | 0.00 | H-6→L (92%)                                |
| 9  | 3.35          | 0.04 | H-7→L (82%)                                |
| 10 | 3.49          | 0.01 | H-12→L (85%)<br>H-9→L (12%)                |

## S4.2 different solvents, H-terminated 6T, cc-pVDZ

*in vacuo*

| #  | $E$ (eV) | OS   | transition (weight)                        |
|----|----------|------|--------------------------------------------|
| 1  | 1.46     | 0.10 | H→L (97%)                                  |
| 2  | 2.03     | 0.32 | H-1→L (95%)                                |
| 3  | 2.76     | 0.43 | H→L+1 (63%)<br>H-3→L (28%)                 |
| 4  | 3.01     | 0.02 | H-2→L (85%)                                |
| 5  | 3.10     | 0.01 | H-9→L (74%)<br>H-12→L (14%)                |
| 6  | 3.12     | 2.12 | H-3→L (67%)<br>H→L+1 (26%)                 |
| 7  | 3.43     | 0.00 | H-10→L (61%)<br>H-6→L (28%)                |
| 8  | 3.54     | 0.01 | H-1→L+1 (71%)<br>H→L+2 (19%)               |
| 9  | 3.59     | 0.01 | H-7→L (73%)<br>H-5→L (14%)                 |
| 10 | 3.61     | 0.01 | H-6→L (51%)<br>H-10→L (31%)<br>H-4→L (12%) |

**benzene (apolar)**

| #  | $E$ (eV) | OS   | transition (weight)                        |
|----|----------|------|--------------------------------------------|
| 1  | 1.39     | 0.13 | H→L (97%)                                  |
| 2  | 1.97     | 0.56 | H-1→L (94%)                                |
| 3  | 2.70     | 0.48 | H→L+1 (63%)<br>H-3→L (28%)                 |
| 4  | 2.96     | 2.26 | H-3→L (67%)<br>H→L+1 (25%)                 |
| 5  | 2.96     | 0.02 | H-2→L (84%)                                |
| 6  | 3.04     | 0.01 | H-9→L (73%)<br>H-12→L (12%)                |
| 7  | 3.38     | 0.00 | H-10→L (68%)<br>H-6→L (21%)                |
| 8  | 3.44     | 0.01 | H-1→L+1 (68%)<br>H→L+2 (24%)               |
| 9  | 3.58     | 0.00 | H-7→L (68%)<br>H-5→L (16%)<br>H-12→L (11%) |
| 10 | 3.59     | 0.01 | H-6→L (56%)<br>H-10→L (22%)<br>H-4→L (16%) |

**chloroform (semi-polar)**

| #  | $E$ (eV) | OS   | transition (weight)                        |
|----|----------|------|--------------------------------------------|
| 1  | 1.39     | 0.13 | H→L (97%)                                  |
| 2  | 1.97     | 0.58 | H-1→L (94%)                                |
| 3  | 2.70     | 0.46 | H→L+1 (62%)<br>H-3→L (29%)                 |
| 4  | 2.95     | 0.02 | H-2→L (76%)<br>H-9→L (12%)                 |
| 5  | 2.97     | 2.24 | H-3→L (65%)<br>H→L+1 (26%)                 |
| 6  | 3.01     | 0.01 | H-9→L (66%)<br>H-2→L (14%)<br>H-12→L (10%) |
| 7  | 3.35     | 0.00 | H-10→L (69%)<br>H-6→L (18%)                |
| 8  | 3.45     | 0.01 | H-1→L+1 (67%)<br>H→L+2 (24%)               |
| 9  | 3.58     | 0.00 | H-7→L (60%)<br>H-12→L (16%)<br>H-5→L (16%) |
| 10 | 3.60     | 0.01 | H-6→L (58%)<br>H-4→L (19%)<br>H-10→L (17%) |

**nitromethane (polar)**

| #  | $E$ (eV) | OS   | transition (weight)                                        |
|----|----------|------|------------------------------------------------------------|
| 1  | 1.39     | 0.14 | H→L (97%)                                                  |
| 2  | 1.97     | 0.58 | H-1→L (95%)                                                |
| 3  | 2.71     | 0.44 | H→L+1 (61%)<br>H-3→L (30%)                                 |
| 4  | 2.94     | 0.00 | H-9→L (46%)<br>H-2→L (35%)<br>H-11→L (12%)                 |
| 5  | 2.98     | 0.03 | H-2→L (55%)<br>H-9→L (30%)                                 |
| 6  | 2.99     | 2.21 | H-3→L (64%)<br>H→L+1 (27%)                                 |
| 7  | 3.31     | 0.01 | H-10→L (65%)<br>H-6→L (17%)<br>H-8→L (14%)                 |
| 8  | 3.46     | 0.01 | H-1→L+1 (66%)<br>H→L+2 (25%)                               |
| 9  | 3.58     | 0.00 | H-7→L (41%)<br>H-11→L (25%)<br>H-12→L (20%)<br>H-5→L (12%) |
| 10 | 3.62     | 0.01 | H-6→L (56%)<br>H-4→L (22%)<br>H-10→L (13%)                 |

### S4.3 different solvents, CH<sub>3</sub>-functionalized 6T, cc-pVDZ

*in vacuo*

| #  | <i>E</i> (eV) | OS   | transition (weight)         |
|----|---------------|------|-----------------------------|
| 1  | 1.34          | 0.11 | H→L (98%)                   |
| 2  | 1.95          | 0.40 | H-1→L (94%)                 |
| 3  | 2.69          | 0.32 | H→L+1 (56%)<br>H-3→L (35%)  |
| 4  | 2.92          | 0.13 | H-2→L (70%)<br>H-9→L (12%)  |
| 5  | 3.04          | 0.17 | H-9→L (67%)<br>H-12→L (14%) |
| 6  | 3.07          | 1.73 | H-3→L (51%)<br>H→L+1 (29%)  |
| 7  | 3.28          | 0.00 | H-10→L (89%)                |
| 8  | 3.32          | 0.03 | H-7→L (50%)<br>H-6→L (34%)  |
| 9  | 3.32          | 0.00 | H-6→L (57%)<br>H-7→L (36%)  |
| 10 | 3.52          | 0.01 | H-12→L (79%)<br>H-9→L (15%) |

**benzene (apolar)**

| #  | <i>E</i> (eV) | OS   | transition (weight)                        |
|----|---------------|------|--------------------------------------------|
| 1  | 1.29          | 0.14 | H→L (98%)                                  |
| 2  | 1.88          | 0.71 | H-1→L (94%)                                |
| 3  | 2.62          | 0.41 | H→L+1 (59%)<br>H-3→L (32%)                 |
| 4  | 2.89          | 0.67 | H-2→L (45%)<br>H-3→L (24%)<br>H-9→L (11%)  |
| 5  | 2.92          | 1.46 | H-3→L (36%)<br>H-2→L (27%)<br>H→L+1 (22%)  |
| 6  | 3.00          | 0.02 | H-9→L (67%)<br>H-2→L (16%)<br>H-12→L (12%) |
| 7  | 3.26          | 0.00 | H-10→L (92%)                               |
| 8  | 3.34          | 0.01 | H-7→L (86%)                                |
| 9  | 3.36          | 0.00 | H-6→L (91%)                                |
| 10 | 3.43          | 0.01 | H-1→L+1 (72%)<br>H→L+2 (19%)               |



**chloroform (semi-polar)**

| #  | $E$ (eV) | OS   | transition (weight)                        |
|----|----------|------|--------------------------------------------|
| 1  | 1.30     | 0.15 | H→L (98%)                                  |
| 2  | 1.88     | 0.73 | H-1→L (94%)                                |
| 3  | 2.63     | 0.41 | H→L+1 (58%)<br>H-3→L (32%)                 |
| 4  | 2.88     | 0.21 | H-2→L (51%)<br>H-9→L (20%)<br>H-3→L (13%)  |
| 5  | 2.92     | 1.84 | H-3→L (46%)<br>H→L+1 (29%)<br>H-2→L (14%)  |
| 6  | 2.97     | 0.03 | H-9→L (54%)<br>H-2→L (23%)<br>H-12→L (11%) |
| 7  | 3.24     | 0.01 | H-10→L (94%)                               |
| 8  | 3.36     | 0.01 | H-7→L (81%)<br>H-6→L (11%)                 |
| 9  | 3.38     | 0.00 | H-6→L (84%)<br>H-7→L (11%)                 |
| 10 | 3.43     | 0.01 | H-1→L+1 (72%)<br>H→L+2 (18%)               |

**nitromethane (polar)**

| #  | $E$ (eV) | OS   | transition (weight)                         |
|----|----------|------|---------------------------------------------|
| 1  | 1.31     | 0.15 | H→L (98%)                                   |
| 2  | 1.88     | 0.75 | H-1→L (94%)                                 |
| 3  | 2.63     | 0.38 | H→L+1 (57%)<br>H-3→L (33%)                  |
| 4  | 2.86     | 0.05 | H-2→L (41%)<br>H-8→L (35%)                  |
| 5  | 2.93     | 1.88 | H-3→L (46%)<br>H→L+1 (32%)<br>H-2→L (12%)   |
| 6  | 2.94     | 0.10 | H-8→L (41%)<br>H-2→L (35%)                  |
| 7  | 3.20     | 0.02 | H-10→L (93%)                                |
| 8  | 3.37     | 0.01 | H-7→L (79%)<br>H-6→L (13%)                  |
| 9  | 3.41     | 0.00 | H-6→L (79%)<br>H-7→L (15%)                  |
| 10 | 3.44     | 0.01 | H-12→L (65%)<br>H-11→L (16%)<br>H-8→L (12%) |

S4.4 different solvents, H-terminated 6T, cc-pVTZ

*in vacuo*

| #  | $E$ (eV) | OS   | transition (weight)                        |
|----|----------|------|--------------------------------------------|
| 1  | 1.38     | 0.09 | H→L (97%)                                  |
| 2  | 1.95     | 0.33 | H-1→L (95%)                                |
| 3  | 2.71     | 0.41 | H→L+1 (63%)<br>H-3→L (27%)                 |
| 4  | 2.93     | 0.02 | H-2→L (89%)                                |
| 5  | 3.07     | 2.01 | H-3→L (67%)<br>H→L+1 (25%)                 |
| 6  | 3.08     | 0.00 | H-9→L (75%)<br>H-12→L (16%)                |
| 7  | 3.34     | 0.00 | H-10→L (56%)<br>H-6→L (32%)                |
| 8  | 3.46     | 0.00 | H-1→L+1 (67%)<br>H→L+2 (20%)               |
| 9  | 3.50     | 0.01 | H-7→L (69%)<br>H-5→L (16%)                 |
| 10 | 3.51     | 0.01 | H-6→L (46%)<br>H-10→L (34%)<br>H-4→L (13%) |

**benzene (apolar)**

| #  | $E$ (eV) | OS   | transition (weight)                        |
|----|----------|------|--------------------------------------------|
| 1  | 1.31     | 0.12 | H→L (97%)                                  |
| 2  | 1.89     | 0.60 | H-1→L (94%)                                |
| 3  | 2.65     | 0.46 | H→L+1 (64%)<br>H-3→L (27%)                 |
| 4  | 2.88     | 0.03 | H-2→L (89%)                                |
| 5  | 2.91     | 2.18 | H-3→L (66%)<br>H→L+1 (25%)                 |
| 6  | 3.01     | 0.00 | H-9→L (76%)<br>H-12→L (14%)                |
| 7  | 3.28     | 0.00 | H-10→L (64%)<br>H-6→L (23%)                |
| 8  | 3.36     | 0.01 | H-1→L+1 (67%)<br>H→L+2 (25%)               |
| 9  | 3.49     | 0.01 | H-7→L (68%)<br>H-5→L (19%)                 |
| 10 | 3.49     | 0.01 | H-6→L (52%)<br>H-10→L (23%)<br>H-4→L (18%) |

**chloroform (semi-polar)**

| #  | $E$ (eV) | OS   | transition (weight)                                                                  |
|----|----------|------|--------------------------------------------------------------------------------------|
| 1  | 1.31     | 0.13 | H $\rightarrow$ L (97%)                                                              |
| 2  | 1.88     | 0.61 | H-1 $\rightarrow$ L (94%)                                                            |
| 3  | 2.66     | 0.43 | H $\rightarrow$ L+1 (62%)<br>H-3 $\rightarrow$ L (28%)                               |
| 4  | 2.87     | 0.03 | H-2 $\rightarrow$ L (89%)                                                            |
| 5  | 2.92     | 2.15 | H-3 $\rightarrow$ L (64%)<br>H $\rightarrow$ L+1 (26%)                               |
| 6  | 2.98     | 0.00 | H-9 $\rightarrow$ L (76%)<br>H-12 $\rightarrow$ L (12%)                              |
| 7  | 3.25     | 0.01 | H-10 $\rightarrow$ L (65%)<br>H-6 $\rightarrow$ L (19%)                              |
| 8  | 3.38     | 0.01 | H-1 $\rightarrow$ L+1 (66%)<br>H $\rightarrow$ L+2 (25%)                             |
| 9  | 3.49     | 0.01 | H-7 $\rightarrow$ L (63%)<br>H-5 $\rightarrow$ L (19%)<br>H-12 $\rightarrow$ L (13%) |
| 10 | 3.50     | 0.01 | H-6 $\rightarrow$ L (53%)<br>H-4 $\rightarrow$ L (21%)<br>H-10 $\rightarrow$ L (18%) |

**nitromethane (polar)**

| #  | $E$ (eV) | OS   | transition (weight)                                                                                                |
|----|----------|------|--------------------------------------------------------------------------------------------------------------------|
| 1  | 1.32     | 0.13 | H $\rightarrow$ L (97%)                                                                                            |
| 2  | 1.89     | 0.62 | H-1 $\rightarrow$ L (94%)                                                                                          |
| 3  | 2.67     | 0.41 | H $\rightarrow$ L+1 (61%)<br>H-3 $\rightarrow$ L (30%)                                                             |
| 4  | 2.87     | 0.02 | H-2 $\rightarrow$ L (87%)                                                                                          |
| 5  | 2.93     | 0.01 | H-9 $\rightarrow$ L (73%)                                                                                          |
| 6  | 2.94     | 2.12 | H-3 $\rightarrow$ L (62%)<br>H $\rightarrow$ L+1 (27%)                                                             |
| 7  | 3.21     | 0.01 | H-10 $\rightarrow$ L (58%)<br>H-8 $\rightarrow$ L (19%)<br>H-6 $\rightarrow$ L (17%)                               |
| 8  | 3.39     | 0.01 | H-1 $\rightarrow$ L+1 (65%)<br>H $\rightarrow$ L+2 (26%)                                                           |
| 9  | 3.50     | 0.00 | H-7 $\rightarrow$ L (48%)<br>H-12 $\rightarrow$ L (22%)<br>H-5 $\rightarrow$ L (17%)<br>H-11 $\rightarrow$ L (11%) |
| 10 | 3.52     | 0.01 | H-6 $\rightarrow$ L (52%)<br>H-4 $\rightarrow$ L (25%)<br>H-10 $\rightarrow$ L (12%)                               |

S4.5 *in vacuo*, CH<sub>3</sub>-functionalized 6T, different basis sets

**cc-pVDZ**

| #  | <i>E</i> (eV) | OS   | transition (weight)         |
|----|---------------|------|-----------------------------|
| 1  | 1.34          | 0.11 | H→L (98%)                   |
| 2  | 1.95          | 0.40 | H-1→L (94%)                 |
| 3  | 2.69          | 0.32 | H→L+1 (56%)<br>H-3→L (35%)  |
| 4  | 2.92          | 0.13 | H-2→L (70%)<br>H-9→L (12%)  |
| 5  | 3.04          | 0.17 | H-9→L (67%)<br>H-12→L (14%) |
| 6  | 3.07          | 1.73 | H-3→L (51%)<br>H→L+1 (29%)  |
| 7  | 3.28          | 0.00 | H-10→L (89%)                |
| 8  | 3.32          | 0.03 | H-7→L (50%)<br>H-6→L (34%)  |
| 9  | 3.32          | 0.00 | H-6→L (57%)<br>H-7→L (36%)  |
| 10 | 3.52          | 0.01 | H-12→L (79%)<br>H-9→L (15%) |

**6-31G(d,p)**

| #  | <i>E</i> (eV) | OS   | transition (weight)         |
|----|---------------|------|-----------------------------|
| 1  | 1.34          | 0.11 | H→L (98%)                   |
| 2  | 1.94          | 0.42 | H-1→L (94%)                 |
| 3  | 2.69          | 0.26 | H→L+1 (53%)<br>H-3→L (38%)  |
| 4  | 2.91          | 0.10 | H-2→L (71%)<br>H-9→L (13%)  |
| 5  | 3.04          | 0.18 | H-9→L (65%)<br>H-12→L (14%) |
| 6  | 3.06          | 1.79 | H-3→L (49%)<br>H→L+1 (32%)  |
| 7  | 3.30          | 0.00 | H-10→L (88%)                |
| 8  | 3.32          | 0.00 | H-6→L (92%)                 |
| 9  | 3.33          | 0.03 | H-7→L (82%)                 |
| 10 | 3.52          | 0.01 | H-12→L (79%)<br>H-9→L (16%) |

**6-31+G(d,p)**

| #  | $E$ (eV) | OS   | transition (weight)                        |
|----|----------|------|--------------------------------------------|
| 1  | 1.28     | 0.10 | H→L (98%)                                  |
| 2  | 1.88     | 0.45 | H-1→L (94%)                                |
| 3  | 2.65     | 0.27 | H→L+1 (54%)<br>H-3→L (36%)                 |
| 4  | 2.85     | 0.10 | H-2→L (80%)                                |
| 5  | 3.01     | 1.81 | H-3→L (51%)<br>H→L+1 (33%)                 |
| 6  | 3.03     | 0.06 | H-9→L (81%)<br>H-12→L (11%)                |
| 7  | 3.22     | 0.01 | H-10→L (66%)<br>H-7→L (27%)                |
| 8  | 3.24     | 0.02 | H-6→L (80%)<br>H-7→L (12%)                 |
| 9  | 3.24     | 0.02 | H-7→L (51%)<br>H-10→L (30%)<br>H-6→L (11%) |
| 10 | 3.49     | 0.00 | H-1→L+1 (72%)<br>H→L+2 (15%)               |

**6-31++G(d,p)**

| #  | $E$ (eV) | OS   | transition (weight)                        |
|----|----------|------|--------------------------------------------|
| 1  | 1.28     | 0.10 | H→L (98%)                                  |
| 2  | 1.88     | 0.45 | H-1→L (94%)                                |
| 3  | 2.65     | 0.27 | H→L+1 (54%)<br>H-3→L (36%)                 |
| 4  | 2.85     | 0.11 | H-2→L (80%)                                |
| 5  | 3.01     | 1.80 | H-3→L (51%)<br>H→L+1 (33%)                 |
| 6  | 3.03     | 0.06 | H-9→L (81%)<br>H-12→L (11%)                |
| 7  | 3.22     | 0.01 | H-10→L (67%)<br>H-7→L (27%)                |
| 8  | 3.24     | 0.03 | H-6→L (74%)<br>H-7→L (15%)                 |
| 9  | 3.24     | 0.02 | H-7→L (48%)<br>H-10→L (29%)<br>H-6→L (17%) |
| 10 | 3.49     | 0.00 | H-1→L+1 (72%)<br>H→L+2 (15%)               |
